# Supplementary material
Source: MDPI journal article supplement (https://www.mdpi.com/2073-4441/16/4/614)
Supplement: s1 [file s1]

## Supplementary Materials

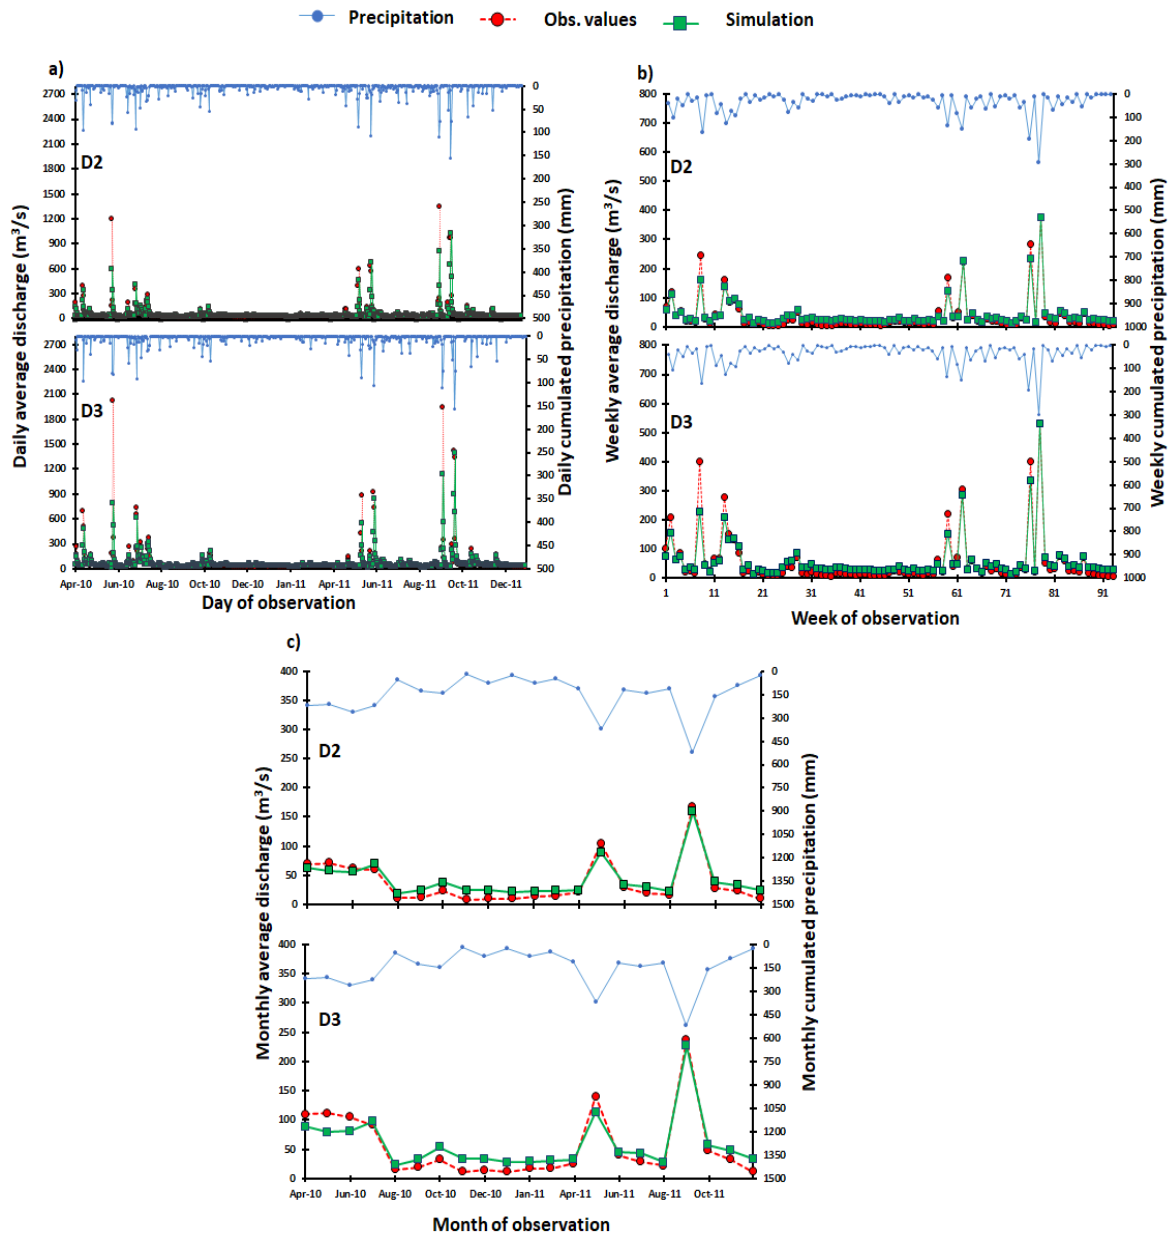

Fig. S1 - Hyeto-hydrograph of daily (a), weekly (b), and monthly (c) average observed and simulated mainstream discharge in stations D2 (central area of the watershed) and D3 (near the estuary) from April 2010 to December 2011. [29]

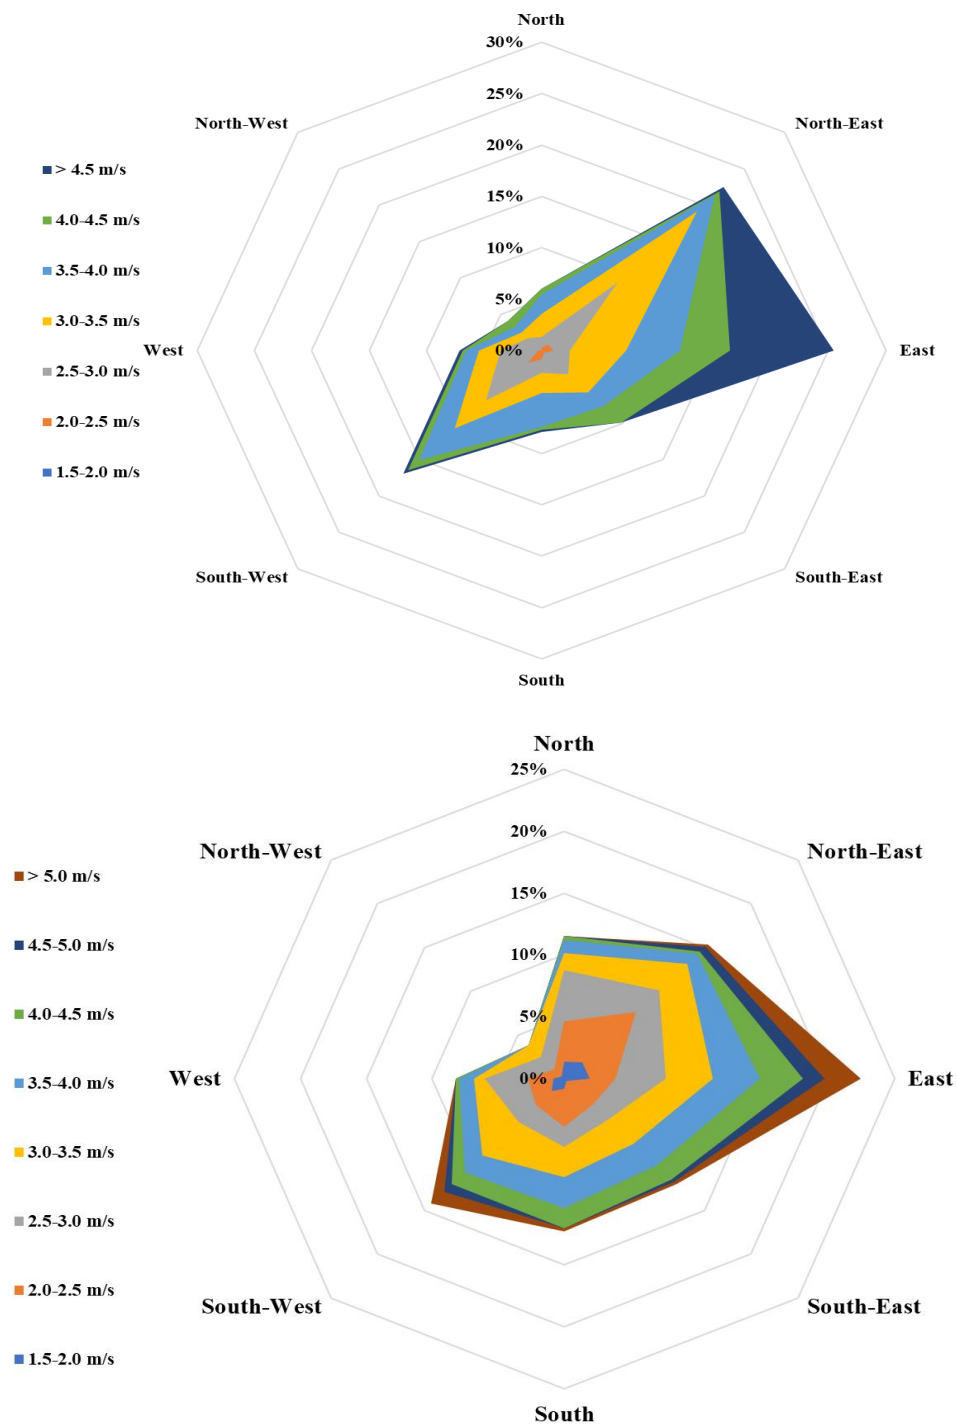

Fig. S2 – Observed and simulated rose wind chart for the period between March 2010 and February 2011 in the Harima Nada region

**Table S1** – Mainstream discharge performance of the Kako River in stations D2 (central area of the watershed) and D3 (near the estuary) at different time resolutions [29]

| April 2009 – Dec 2011 | R <sup>2</sup> | NSE  | pBIAS | RSR  |
|-----------------------|----------------|------|-------|------|
| <b>D2</b>             |                |      |       |      |
| Daily                 | 0.85           | 0.82 | -14.8 | 0.42 |
| Weekly                | 0.96           | 0.94 | -15.4 | 0.25 |
| Monthly               | 0.97           | 0.92 | -14.7 | 0.21 |
| <b>D3</b>             |                |      |       |      |
| Daily                 | 0.81           | 0.77 | -8.36 | 0.48 |
| Weekly                | 0.94           | 0.91 | -8.96 | 0.30 |
| Monthly               | 0.94           | 0.91 | -8.34 | 0.22 |

**Table S2** – Monthly validation of WRF results in different AMeDAS stations of the Harima Nada region for temperature, u-wind, v-wind, wind speed, relative humidity, and atmospheric pressure

| Temperature (°C) |      |         |         |        |         |        |        |        |
|------------------|------|---------|---------|--------|---------|--------|--------|--------|
| <b>Himeji</b>    |      |         |         |        |         |        |        |        |
|                  | N    | obs_ave | sim_ave | R      | MBE     | MAE    | RMSE   | IA     |
| 2010/03          | 744  | 8.3468  | 8.5699  | 0.9426 | 0.2231  | 1.0822 | 1.3719 | 0.9692 |
| 2010/04          | 720  | 12.3094 | 12.5283 | 0.9495 | 0.2188  | 1.0402 | 1.3215 | 0.9705 |
| 2010/05          | 744  | 17.5883 | 18.339  | 0.9287 | 0.7507  | 1.337  | 1.7444 | 0.955  |
| 2010/06          | 720  | 22.8949 | 24.1174 | 0.9311 | 1.2226  | 1.4261 | 1.7324 | 0.9314 |
| 2010/07          | 744  | 26.6551 | 27.7309 | 0.9092 | 1.0758  | 1.2552 | 1.5987 | 0.9182 |
| 2010/08          | 744  | 29.4685 | 29.8157 | 0.8925 | 0.3472  | 0.99   | 1.2348 | 0.9391 |
| 2010/09          | 720  | 25.414  | 25.9615 | 0.9644 | 0.5475  | 1.1961 | 1.5164 | 0.9701 |
| 2010/10          | 744  | 18.8435 | 19.5654 | 0.9331 | 0.7219  | 1.2058 | 1.5586 | 0.9566 |
| 2010/11          | 720  | 11.2768 | 11.8512 | 0.9336 | 0.5744  | 1.2872 | 1.6023 | 0.9539 |
| 2010/12          | 744  | 6.8011  | 7.2398  | 0.9338 | 0.4387  | 1.2896 | 1.6565 | 0.9634 |
| 2011/01          | 744  | 2.4086  | 2.079   | 0.9102 | -0.3296 | 1.263  | 1.5051 | 0.9308 |
| 2011/02          | 672  | 5.765   | 6.0041  | 0.9445 | 0.2391  | 1.2406 | 1.5007 | 0.9691 |
| all              | 8760 | 15.7034 | 16.2066 | 0.9887 | 0.5032  | 1.2173 | 1.5361 | 0.9936 |
| <b>Takamatsu</b> |      |         |         |        |         |        |        |        |
|                  | N    | obs_ave | sim_ave | R      | MBE     | MAE    | RMSE   | IA     |
| 2010/03          | 744  | 9.2488  | 9.9501  | 0.8936 | 0.7013  | 1.3495 | 1.9723 | 0.9358 |
| 2010/04          | 720  | 13.1494 | 13.6562 | 0.9315 | 0.5067  | 1.1206 | 1.4717 | 0.9601 |
| 2010/05          | 744  | 18.8095 | 19.8446 | 0.9281 | 1.035   | 1.4891 | 1.9004 | 0.944  |
| 2010/06          | 720  | 23.8833 | 25.0229 | 0.9348 | 1.1396  | 1.342  | 1.6581 | 0.938  |
| 2010/07          | 744  | 27.7642 | 29.2392 | 0.8659 | 1.475   | 1.6335 | 2.0811 | 0.8705 |
| 2010/08          | 744  | 30.3792 | 31.13   | 0.8962 | 0.7508  | 1.0405 | 1.3688 | 0.9236 |
| 2010/09          | 720  | 26.711  | 27.1101 | 0.9666 | 0.3991  | 0.996  | 1.263  | 0.9785 |

|         |      |         |         |        |         |        |        |        |
|---------|------|---------|---------|--------|---------|--------|--------|--------|
| 2010/10 | 744  | 19.8003 | 20.4578 | 0.9464 | 0.6576  | 1.0127 | 1.3162 | 0.9636 |
| 2010/11 | 720  | 12.6878 | 13.1367 | 0.9002 | 0.4489  | 1.2739 | 1.5893 | 0.939  |
| 2010/12 | 744  | 8.3413  | 8.2317  | 0.9135 | -0.1095 | 1.3743 | 1.7064 | 0.9544 |
| 2011/01 | 744  | 4.047   | 3.3722  | 0.9036 | -0.6748 | 1.0397 | 1.2967 | 0.9299 |
| 2011/02 | 672  | 6.5969  | 6.8774  | 0.9377 | 0.2805  | 1.1498 | 1.471  | 0.9668 |
| all     | 8760 | 16.8432 | 17.3955 | 0.988  | 0.5523  | 1.2364 | 1.6156 | 0.9928 |

#### Kobe

|         | N    | obs_ave | sim_ave | R      | MBE     | MAE    | RMSE   | IA     |
|---------|------|---------|---------|--------|---------|--------|--------|--------|
| 2010/03 | 744  | 9.7935  | 8.8466  | 0.9337 | -0.947  | 1.3174 | 1.6292 | 0.9487 |
| 2010/04 | 720  | 13.5051 | 12.7505 | 0.9355 | -0.7547 | 1.1681 | 1.4609 | 0.9551 |
| 2010/05 | 744  | 18.5598 | 17.8812 | 0.915  | -0.6786 | 1.3902 | 1.6628 | 0.9423 |
| 2010/06 | 720  | 23.6361 | 23.3448 | 0.8824 | -0.2913 | 1.1508 | 1.3912 | 0.9283 |
| 2010/07 | 744  | 27.3223 | 26.5718 | 0.8558 | -0.7505 | 1.3325 | 1.5882 | 0.8984 |
| 2010/08 | 744  | 29.8207 | 28.7637 | 0.8998 | -1.057  | 1.3222 | 1.5602 | 0.8726 |
| 2010/09 | 720  | 26.5965 | 25.4577 | 0.9427 | -1.1389 | 1.4629 | 1.6707 | 0.9469 |
| 2010/10 | 744  | 20.514  | 19.7594 | 0.9202 | -0.7546 | 1.3846 | 1.6334 | 0.9429 |
| 2010/11 | 720  | 13.5792 | 12.3953 | 0.9365 | -1.1838 | 1.355  | 1.588  | 0.9261 |
| 2010/12 | 744  | 9.0038  | 7.7929  | 0.965  | -1.2108 | 1.4335 | 1.6719 | 0.9591 |
| 2011/01 | 744  | 4.1958  | 2.4916  | 0.9294 | -1.7042 | 1.7254 | 1.9361 | 0.8573 |
| 2011/02 | 672  | 7.5287  | 6.4665  | 0.9543 | -1.0622 | 1.3812 | 1.6278 | 0.9555 |
| all     | 8760 | 17.057  | 16.0954 | 0.9898 | -0.9616 | 1.3695 | 1.6242 | 0.9917 |

#### u- wind (m/s)

| Himeji  | N    | obs_ave | sim_ave | R      | MBE     | MAE    | RMSE   | IA     |
|---------|------|---------|---------|--------|---------|--------|--------|--------|
| 2010/03 | 741  | 0.5012  | 0.0443  | 0.7589 | -0.4568 | 1.4306 | 1.7906 | 0.8494 |
| 2010/04 | 720  | 0.1132  | -0.1739 | 0.6868 | -0.2871 | 1.3727 | 1.7566 | 0.8218 |
| 2010/05 | 742  | 0.222   | -0.0577 | 0.6351 | -0.2798 | 1.3464 | 1.679  | 0.793  |
| 2010/06 | 718  | 0.0618  | -0.1726 | 0.5863 | -0.2344 | 1.2395 | 1.5219 | 0.7645 |
| 2010/07 | 742  | 0.2075  | 0.2575  | 0.4504 | 0.0499  | 1.1851 | 1.5379 | 0.6762 |
| 2010/08 | 744  | 0.211   | 0.1306  | 0.4963 | -0.0804 | 1.2042 | 1.486  | 0.7014 |
| 2010/09 | 720  | 0.466   | 0.1219  | 0.4938 | -0.344  | 1.416  | 1.7855 | 0.7001 |
| 2010/10 | 740  | -0.0245 | -0.8723 | 0.5171 | -0.8478 | 1.5113 | 1.8819 | 0.6829 |
| 2010/11 | 719  | 1.1813  | 0.9349  | 0.7011 | -0.2464 | 1.1848 | 1.4901 | 0.8182 |
| 2010/12 | 743  | 1.9151  | 1.8349  | 0.7846 | -0.0801 | 1.4    | 1.7517 | 0.8763 |
| 2011/01 | 743  | 2.2395  | 2.4675  | 0.6603 | 0.228   | 1.281  | 1.6427 | 0.8068 |
| 2011/02 | 660  | 0.3205  | -0.0763 | 0.5906 | -0.3967 | 1.1963 | 1.4902 | 0.7525 |
| all     | 8732 | 0.6228  | 0.3768  | 0.6938 | -0.246  | 1.3152 | 1.6583 | 0.8248 |

#### Takamatsu

|         | N   | obs_ave | sim_ave | R      | MBE     | MAE    | RMSE   | IA     |
|---------|-----|---------|---------|--------|---------|--------|--------|--------|
| 2010/03 | 727 | 0.88    | 0.6672  | 0.8216 | -0.2128 | 1.3682 | 1.7772 | 0.9009 |
| 2010/04 | 710 | 0.2078  | -0.016  | 0.8666 | -0.2238 | 1.2038 | 1.5527 | 0.927  |

|         |      |         |         |        |         |        |        |        |
|---------|------|---------|---------|--------|---------|--------|--------|--------|
| 2010/05 | 737  | 0.2626  | 0.4108  | 0.8077 | 0.1482  | 1.2797 | 1.664  | 0.8958 |
| 2010/06 | 715  | -0.2122 | -0.0817 | 0.6458 | 0.1306  | 1.5598 | 1.9985 | 0.7913 |
| 2010/07 | 738  | 0.2118  | 1.1781  | 0.5978 | 0.9663  | 1.6117 | 2.0839 | 0.7239 |
| 2010/08 | 739  | -0.4956 | 0.188   | 0.731  | 0.6836  | 1.5102 | 1.951  | 0.8377 |
| 2010/09 | 718  | 0.7898  | 0.7575  | 0.6784 | -0.0323 | 1.3846 | 1.824  | 0.8219 |
| 2010/10 | 740  | 0.2047  | -0.6522 | 0.7559 | -0.8569 | 1.4157 | 1.7481 | 0.8266 |
| 2010/11 | 718  | 1.3812  | 1.3208  | 0.8239 | -0.0603 | 0.9924 | 1.2981 | 0.9047 |
| 2010/12 | 743  | 2.1231  | 2.4109  | 0.8261 | 0.2878  | 1.3592 | 1.7568 | 0.9012 |
| 2011/01 | 740  | 3.1431  | 3.3137  | 0.7496 | 0.1706  | 1.125  | 1.5035 | 0.8618 |
| 2011/02 | 657  | 0.4805  | 0.0164  | 0.7515 | -0.4641 | 1.1174 | 1.4457 | 0.8511 |
| all     | 8682 | 0.7542  | 0.8051  | 0.7893 | 0.0509  | 1.3296 | 1.7346 | 0.8845 |

| Kobe    |      |         |         |        |         |        |        |        |
|---------|------|---------|---------|--------|---------|--------|--------|--------|
|         | N    | obs_ave | sim_ave | R      | MBE     | MAE    | RMSE   | IA     |
| 2010/03 | 743  | 0.0164  | 0.6032  | 0.7998 | 0.5869  | 1.8753 | 2.3688 | 0.8655 |
| 2010/04 | 719  | -0.5121 | 0.1716  | 0.7863 | 0.6837  | 1.9184 | 2.4809 | 0.8478 |
| 2010/05 | 740  | 0.0869  | 0.5394  | 0.7905 | 0.4525  | 1.6135 | 2.084  | 0.8612 |
| 2010/06 | 719  | 0.2609  | 0.715   | 0.8263 | 0.4542  | 1.4809 | 1.9536 | 0.8733 |
| 2010/07 | 740  | 1.7218  | 1.7215  | 0.624  | -0.0003 | 1.1269 | 1.4952 | 0.7593 |
| 2010/08 | 741  | 1.2366  | 1.2913  | 0.7422 | 0.0547  | 1.3378 | 1.7939 | 0.809  |
| 2010/09 | 719  | 0.4576  | 0.8978  | 0.7187 | 0.4402  | 1.5739 | 2.0637 | 0.7994 |
| 2010/10 | 744  | -1.8988 | -1.1056 | 0.7269 | 0.7931  | 1.8879 | 2.3453 | 0.7991 |
| 2010/11 | 719  | 0.3583  | 1.0592  | 0.7983 | 0.7009  | 1.621  | 2.0756 | 0.8543 |
| 2010/12 | 743  | 1.8032  | 2.4281  | 0.8429 | 0.625   | 1.7644 | 2.359  | 0.8908 |
| 2011/01 | 743  | 3.3591  | 2.9742  | 0.7291 | -0.3849 | 1.3988 | 1.764  | 0.8409 |
| 2011/02 | 670  | -0.5571 | -0.0735 | 0.677  | 0.4837  | 1.7476 | 2.1828 | 0.7805 |
| all     | 8740 | 0.5403  | 0.9456  | 0.8062 | 0.4053  | 1.6109 | 2.0983 | 0.8696 |

**v-wind (m/s)**

| Himeji  |     |         |         |        |         |        |        |        |
|---------|-----|---------|---------|--------|---------|--------|--------|--------|
|         | N   | obs_ave | sim_ave | R      | MBE     | MAE    | RMSE   | IA     |
| 2010/03 | 741 | -0.8302 | -1.2991 | 0.7575 | -0.4689 | 1.475  | 1.9759 | 0.8543 |
| 2010/04 | 720 | -0.4453 | -0.7273 | 0.7365 | -0.2821 | 1.3845 | 1.8824 | 0.8491 |
| 2010/05 | 742 | 0.3024  | 0.2604  | 0.7088 | -0.042  | 1.5842 | 2.1384 | 0.8359 |
| 2010/06 | 718 | 0.5721  | 0.9036  | 0.5527 | 0.3315  | 1.4774 | 1.9305 | 0.7445 |
| 2010/07 | 742 | 1.0656  | 1.8696  | 0.6114 | 0.804   | 1.5628 | 1.9772 | 0.7601 |
| 2010/08 | 744 | 1.4691  | 2.1179  | 0.6353 | 0.6488  | 1.5277 | 1.8971 | 0.7753 |
| 2010/09 | 720 | 0.1007  | -0.3088 | 0.757  | -0.4095 | 1.3713 | 1.875  | 0.8585 |
| 2010/10 | 740 | -1.164  | -1.6549 | 0.4678 | -0.4909 | 1.5441 | 2.0689 | 0.6618 |
| 2010/11 | 719 | -0.9112 | -1.1154 | 0.5617 | -0.2042 | 1.1717 | 1.5194 | 0.7404 |
| 2010/12 | 743 | -0.7162 | -0.7878 | 0.512  | -0.0715 | 1.2726 | 1.665  | 0.7048 |
| 2011/01 | 743 | -0.8911 | -1.1773 | 0.4077 | -0.2861 | 1.0575 | 1.3622 | 0.643  |
| 2011/02 | 660 | -1.0209 | -1.3478 | 0.6965 | -0.327  | 1.2507 | 1.6648 | 0.8239 |

|                         |      |         |         |        |         |        |        |        |
|-------------------------|------|---------|---------|--------|---------|--------|--------|--------|
| all                     | 8732 | -0.198  | -0.2611 | 0.7115 | -0.0631 | 1.3916 | 1.8448 | 0.8365 |
| <b>Takamatsu</b>        |      |         |         |        |         |        |        |        |
|                         | N    | obs_ave | sim_ave | R      | MBE     | MAE    | RMSE   | IA     |
| 2010/03                 | 727  | -0.2926 | -0.7076 | 0.4001 | -0.415  | 1.5144 | 2.0511 | 0.6402 |
| 2010/04                 | 710  | -0.3357 | -0.5994 | 0.4478 | -0.2638 | 1.3706 | 1.846  | 0.6738 |
| 2010/05                 | 737  | -0.4813 | -0.4843 | 0.3019 | -0.003  | 1.4314 | 1.8839 | 0.5891 |
| 2010/06                 | 715  | -0.4364 | 0.232   | 0.0947 | 0.6684  | 1.3133 | 1.8049 | 0.4624 |
| 2010/07                 | 738  | -0.2015 | 0.5327  | 0.2086 | 0.7342  | 1.3392 | 1.756  | 0.4963 |
| 2010/08                 | 739  | 0.2002  | 1.0286  | 0.2567 | 0.8284  | 1.3988 | 1.9489 | 0.5312 |
| 2010/09                 | 718  | -0.086  | -0.4532 | 0.4528 | -0.3672 | 1.3529 | 1.8389 | 0.6754 |
| 2010/10                 | 740  | -0.0558 | -0.8127 | 0.4463 | -0.7568 | 1.4249 | 1.8573 | 0.6501 |
| 2010/11                 | 718  | 0.1254  | -0.4869 | 0.584  | -0.6123 | 1.0907 | 1.4439 | 0.7368 |
| 2010/12                 | 743  | -0.0506 | -0.3149 | 0.4831 | -0.2643 | 1.2077 | 1.5709 | 0.6951 |
| 2011/01                 | 740  | -0.0187 | -0.5671 | 0.5278 | -0.5484 | 1.1417 | 1.4817 | 0.6995 |
| 2011/02                 | 657  | -0.192  | -0.722  | 0.4574 | -0.53   | 1.3175 | 1.72   | 0.6636 |
| all                     | 8682 | -0.1508 | -0.2744 | 0.3847 | -0.1236 | 1.3254 | 1.776  | 0.638  |
| <b>Kobe</b>             |      |         |         |        |         |        |        |        |
|                         | N    | obs_ave | sim_ave | R      | MBE     | MAE    | RMSE   | IA     |
| 2010/03                 | 743  | -0.6561 | -2.0078 | 0.4198 | -1.3516 | 3.022  | 3.9535 | 0.6132 |
| 2010/04                 | 719  | -0.7848 | -1.5668 | 0.5156 | -0.782  | 2.3388 | 3.0619 | 0.7107 |
| 2010/05                 | 740  | -0.2488 | -0.3301 | 0.4656 | -0.0813 | 2.2076 | 2.9895 | 0.692  |
| 2010/06                 | 719  | 0.4639  | 0.7333  | 0.3857 | 0.2695  | 1.7761 | 2.4213 | 0.6301 |
| 2010/07                 | 740  | 1.5355  | 2.0511  | 0.4066 | 0.5156  | 1.5484 | 2.0958 | 0.6338 |
| 2010/08                 | 741  | 1.4008  | 1.8267  | 0.4948 | 0.4259  | 1.3753 | 1.845  | 0.6947 |
| 2010/09                 | 719  | 0.3357  | -0.5007 | 0.6842 | -0.8363 | 1.91   | 2.6075 | 0.7886 |
| 2010/10                 | 744  | -1.4301 | -2.7201 | 0.1667 | -1.29   | 2.6875 | 3.4035 | 0.4913 |
| 2010/11                 | 719  | -0.9821 | -1.5904 | 0.4375 | -0.6083 | 1.9248 | 2.5279 | 0.6415 |
| 2010/12                 | 743  | -0.7018 | -1.3353 | 0.2982 | -0.6336 | 1.9835 | 2.7149 | 0.554  |
| 2011/01                 | 743  | -0.5485 | -1.7676 | 0.4678 | -1.2191 | 1.7161 | 2.1463 | 0.6232 |
| 2011/02                 | 670  | -0.8017 | -2.1883 | 0.4205 | -1.3867 | 2.1366 | 2.9329 | 0.6127 |
| all                     | 8740 | -0.1971 | -0.7738 | 0.5294 | -0.5766 | 2.0526 | 2.7836 | 0.7099 |
| <b>Wind speed (m/s)</b> |      |         |         |        |         |        |        |        |
| <b>Himeji</b>           |      |         |         |        |         |        |        |        |
|                         | N    | obs_ave | sim_ave | R      | MBE     | MAE    | RMSE   | IA     |
| 2010/03                 | 744  | 2.8419  | 3.6499  | 0.6871 | 0.808   | 1.3188 | 1.7151 | 0.7949 |
| 2010/04                 | 720  | 2.7949  | 3.227   | 0.6036 | 0.4321  | 1.1391 | 1.4588 | 0.7611 |
| 2010/05                 | 743  | 2.7848  | 3.1386  | 0.7061 | 0.3538  | 1.0099 | 1.2889 | 0.8243 |
| 2010/06                 | 720  | 2.4074  | 2.3433  | 0.5334 | -0.0641 | 0.9516 | 1.2542 | 0.7361 |
| 2010/07                 | 744  | 2.3832  | 2.7712  | 0.6112 | 0.388   | 0.9892 | 1.3116 | 0.7687 |
| 2010/08                 | 744  | 2.7324  | 2.8144  | 0.6706 | 0.082   | 0.9262 | 1.1686 | 0.8144 |
| 2010/09                 | 720  | 2.6092  | 2.8953  | 0.5893 | 0.2862  | 1.0562 | 1.4196 | 0.7567 |

|         |      |        |        |        |        |        |        |        |
|---------|------|--------|--------|--------|--------|--------|--------|--------|
| 2010/10 | 744  | 2.2418 | 3.0541 | 0.4572 | 0.8123 | 1.2532 | 1.6142 | 0.6366 |
| 2010/11 | 720  | 2.239  | 2.666  | 0.681  | 0.427  | 0.9421 | 1.2244 | 0.8049 |
| 2010/12 | 744  | 2.928  | 3.3964 | 0.7002 | 0.4684 | 1.2028 | 1.5356 | 0.8214 |
| 2011/01 | 744  | 2.8497 | 3.193  | 0.6667 | 0.3433 | 1.0868 | 1.418  | 0.8083 |
| 2011/02 | 668  | 2.3102 | 2.6451 | 0.6065 | 0.335  | 1.0416 | 1.3404 | 0.7711 |
| all     | 8755 | 2.5969 | 2.988  | 0.6391 | 0.3911 | 1.0774 | 1.4058 | 0.7869 |

#### Takamatsu

|         | N    | obs_ave | sim_ave | R      | MBE    | MAE    | RMSE   | IA     |
|---------|------|---------|---------|--------|--------|--------|--------|--------|
| 2010/03 | 744  | 2.6665  | 3.2928  | 0.7036 | 0.6262 | 1.1762 | 1.5725 | 0.8125 |
| 2010/04 | 720  | 2.6674  | 3.1557  | 0.7824 | 0.4883 | 0.9915 | 1.2828 | 0.8669 |
| 2010/05 | 744  | 2.507   | 2.8708  | 0.7119 | 0.3638 | 1.0021 | 1.2786 | 0.8312 |
| 2010/06 | 720  | 2.1117  | 2.4843  | 0.5225 | 0.3727 | 1.0352 | 1.3206 | 0.7098 |
| 2010/07 | 744  | 1.9203  | 2.4797  | 0.3386 | 0.5594 | 1.1874 | 1.5622 | 0.5717 |
| 2010/08 | 744  | 2.3808  | 2.7733  | 0.6158 | 0.3925 | 1.0816 | 1.3721 | 0.777  |
| 2010/09 | 720  | 2.4017  | 2.7718  | 0.67   | 0.3701 | 0.9372 | 1.2107 | 0.8039 |
| 2010/10 | 744  | 2.0728  | 2.778   | 0.5382 | 0.7051 | 1.1066 | 1.4147 | 0.6875 |
| 2010/11 | 720  | 2.3269  | 2.4933  | 0.7906 | 0.1664 | 0.8472 | 1.1158 | 0.8839 |
| 2010/12 | 744  | 3.1327  | 3.5609  | 0.7672 | 0.4282 | 1.1527 | 1.5289 | 0.8642 |
| 2011/01 | 743  | 3.5651  | 3.7214  | 0.7499 | 0.1562 | 1.0239 | 1.3697 | 0.8625 |
| 2011/02 | 672  | 2.0048  | 2.3091  | 0.6681 | 0.3043 | 0.8715 | 1.1416 | 0.8049 |
| all     | 8759 | 2.4847  | 2.8974  | 0.7045 | 0.4127 | 1.0367 | 1.3584 | 0.8255 |

#### Kobe

|         | N    | obs_ave | sim_ave | R      | MBE     | MAE    | RMSE   | IA     |
|---------|------|---------|---------|--------|---------|--------|--------|--------|
| 2010/03 | 744  | 4.0231  | 4.6756  | 0.3388 | 0.6525  | 2.1161 | 2.872  | 0.6093 |
| 2010/04 | 720  | 4.131   | 3.9837  | 0.4466 | -0.1473 | 1.8326 | 2.4008 | 0.663  |
| 2010/05 | 744  | 3.6216  | 3.4991  | 0.6228 | -0.1225 | 1.401  | 1.8684 | 0.7639 |
| 2010/06 | 720  | 3.5256  | 2.8848  | 0.5369 | -0.6408 | 1.417  | 1.8341 | 0.7067 |
| 2010/07 | 744  | 3.063   | 3.1721  | 0.544  | 0.1091  | 1.127  | 1.5565 | 0.7334 |
| 2010/08 | 744  | 3.3804  | 2.9189  | 0.5543 | -0.4615 | 1.1293 | 1.4916 | 0.7352 |
| 2010/09 | 720  | 3.5329  | 3.5506  | 0.3269 | 0.0177  | 1.5149 | 2.0194 | 0.5984 |
| 2010/10 | 744  | 3.9798  | 4.0444  | 0.2498 | 0.0645  | 2.0455 | 2.6208 | 0.5266 |
| 2010/11 | 720  | 3.3817  | 3.5158  | 0.4103 | 0.1342  | 1.575  | 2.0084 | 0.6572 |
| 2010/12 | 744  | 4.3644  | 4.4177  | 0.5168 | 0.0533  | 1.6048 | 2.1746 | 0.7256 |
| 2011/01 | 744  | 4.2134  | 3.952   | 0.5967 | -0.2614 | 1.2998 | 1.632  | 0.7648 |
| 2011/02 | 672  | 3.2147  | 3.4175  | 0.2908 | 0.2028  | 1.6904 | 2.2677 | 0.5697 |
| all     | 8760 | 3.7073  | 3.6735  | 0.4556 | -0.0339 | 1.5615 | 2.101  | 0.6827 |

#### Specific humidity (g/kg)

| Himeji  |     |         |         |        |         |        |        |        |
|---------|-----|---------|---------|--------|---------|--------|--------|--------|
|         | N   | obs_ave | sim_ave | R      | MBE     | MAE    | RMSE   | IA     |
| 2010/03 | 744 | 4.7826  | 4.6203  | 0.936  | -0.1623 | 0.4919 | 0.6678 | 0.9643 |
| 2010/04 | 720 | 5.8671  | 5.4754  | 0.9321 | -0.3917 | 0.6659 | 0.9021 | 0.9571 |

| 2010/05          | 744  | 8.5431  | 7.8628  | 0.8329 | -0.6802 | 1.0712 | 1.6503 | 0.8972 |
|------------------|------|---------|---------|--------|---------|--------|--------|--------|
| 2010/06          | 720  | 12.8831 | 12.3314 | 0.9394 | -0.5517 | 1.0601 | 1.37   | 0.9625 |
| 2010/07          | 744  | 17.2731 | 16.4412 | 0.6227 | -0.8319 | 1.2005 | 1.5317 | 0.7079 |
| 2010/08          | 744  | 18.3117 | 17.8168 | 0.6399 | -0.4949 | 0.9097 | 1.1676 | 0.7746 |
| 2010/09          | 720  | 14.3522 | 13.5657 | 0.9514 | -0.7865 | 1.0414 | 1.3476 | 0.961  |
| 2010/10          | 744  | 9.691   | 9.1552  | 0.8881 | -0.5358 | 0.8819 | 1.1451 | 0.9262 |
| 2010/11          | 720  | 5.6815  | 5.2846  | 0.8486 | -0.3969 | 0.6259 | 0.8724 | 0.9016 |
| 2010/12          | 744  | 4.3615  | 4.2695  | 0.9237 | -0.092  | 0.4478 | 0.643  | 0.9596 |
| 2011/01          | 744  | 2.8005  | 2.8732  | 0.7896 | 0.0727  | 0.2688 | 0.3409 | 0.882  |
| 2011/02          | 672  | 3.8678  | 3.8325  | 0.9333 | -0.0353 | 0.3851 | 0.5001 | 0.9634 |
| all              | 8760 | 9.0698  | 8.6609  | 0.9836 | -0.4089 | 0.7562 | 1.0921 | 0.9902 |
| <b>Takamatsu</b> |      |         |         |        |         |        |        |        |
|                  | N    | obs_ave | sim_ave | R      | MBE     | MAE    | RMSE   | IA     |
| 2010/03          | 744  | 4.7738  | 4.7667  | 0.9159 | -0.0071 | 0.5605 | 0.7791 | 0.9533 |
| 2010/04          | 720  | 5.9161  | 5.7526  | 0.919  | -0.1635 | 0.6675 | 0.9017 | 0.9555 |
| 2010/05          | 744  | 8.1416  | 7.7419  | 0.898  | -0.3996 | 0.9108 | 1.251  | 0.9406 |
| 2010/06          | 720  | 13.0668 | 12.3792 | 0.9451 | -0.6876 | 1.0185 | 1.3342 | 0.9614 |
| 2010/07          | 744  | 17.0436 | 15.7563 | 0.4553 | -1.2873 | 1.5468 | 1.8943 | 0.5459 |
| 2010/08          | 744  | 18.0229 | 16.9471 | 0.5537 | -1.0758 | 1.3601 | 1.6389 | 0.661  |
| 2010/09          | 720  | 14.1771 | 13.3944 | 0.9241 | -0.7827 | 1.1044 | 1.4536 | 0.9456 |
| 2010/10          | 744  | 9.9915  | 9.6485  | 0.9099 | -0.343  | 0.8264 | 1.0633 | 0.9484 |
| 2010/11          | 720  | 5.8834  | 5.5356  | 0.8923 | -0.3477 | 0.6266 | 0.8234 | 0.919  |
| 2010/12          | 744  | 4.4589  | 4.4832  | 0.9319 | 0.0244  | 0.465  | 0.626  | 0.9645 |
| 2011/01          | 744  | 2.7039  | 2.8816  | 0.8467 | 0.1777  | 0.3136 | 0.3766 | 0.8922 |
| 2011/02          | 672  | 3.9445  | 4.0556  | 0.9188 | 0.1111  | 0.4161 | 0.538  | 0.9545 |
| all              | 8760 | 9.0437  | 8.6422  | 0.9822 | -0.4016 | 0.8209 | 1.1504 | 0.9883 |
| <b>Kobe</b>      |      |         |         |        |         |        |        |        |
|                  | N    | obs_ave | sim_ave | R      | MBE     | MAE    | RMSE   | IA     |
| 2010/03          | 744  | 5.2708  | 4.8358  | 0.9289 | -0.435  | 0.6911 | 0.8557 | 0.9515 |
| 2010/04          | 720  | 6.3444  | 5.6262  | 0.9388 | -0.7182 | 0.8398 | 1.0785 | 0.9445 |
| 2010/05          | 744  | 9.1595  | 8.1895  | 0.8575 | -0.97   | 1.2466 | 1.6928 | 0.8941 |
| 2010/06          | 720  | 13.6124 | 12.5861 | 0.9449 | -1.0263 | 1.2123 | 1.5748 | 0.9461 |
| 2010/07          | 744  | 17.8802 | 16.8076 | 0.6613 | -1.0727 | 1.269  | 1.6066 | 0.6986 |
| 2010/08          | 744  | 19.2127 | 18.0353 | 0.7144 | -1.1774 | 1.3081 | 1.6027 | 0.7302 |
| 2010/09          | 720  | 15.2285 | 14.1666 | 0.9527 | -1.0619 | 1.2506 | 1.578  | 0.9568 |
| 2010/10          | 744  | 10.0413 | 9.2558  | 0.8886 | -0.7855 | 1.0006 | 1.2982 | 0.912  |
| 2010/11          | 720  | 6.0613  | 5.4738  | 0.8486 | -0.5875 | 0.7833 | 1.0233 | 0.8871 |
| 2010/12          | 744  | 4.6729  | 4.4369  | 0.9272 | -0.236  | 0.5069 | 0.7068 | 0.958  |
| 2011/01          | 744  | 2.9831  | 2.9112  | 0.8162 | -0.0719 | 0.2564 | 0.3432 | 0.8981 |
| 2011/02          | 672  | 4.1578  | 3.9095  | 0.9332 | -0.2483 | 0.4388 | 0.5796 | 0.9582 |
| all              | 8760 | 9.5881  | 8.8868  | 0.9848 | -0.7013 | 0.9028 | 1.2468 | 0.9879 |



| Atmospheric Pressure (hPa) |      |          |          |        |         |        |        |        |
|----------------------------|------|----------|----------|--------|---------|--------|--------|--------|
| <b>Himeji</b>              |      |          |          |        |         |        |        |        |
|                            | N    | obs_ave  | sim_ave  | R      | MBE     | MAE    | RMSE   | IA     |
| 2010/03                    | 744  | 1013.86  | 1010.973 | 0.9956 | -2.8871 | 2.8871 | 2.9572 | 0.9544 |
| 2010/04                    | 720  | 1013.062 | 1010.319 | 0.9955 | -2.7429 | 2.7428 | 2.7964 | 0.9433 |
| 2010/05                    | 744  | 1007.465 | 1004.629 | 0.9965 | -2.8356 | 2.8356 | 2.8763 | 0.9406 |
| 2010/06                    | 720  | 1006.462 | 1003.474 | 0.9949 | -2.988  | 2.988  | 3.0206 | 0.8893 |
| 2010/07                    | 744  | 1005.815 | 1002.699 | 0.9978 | -3.1165 | 3.1164 | 3.1442 | 0.9405 |
| 2010/08                    | 744  | 1008.994 | 1005.97  | 0.9972 | -3.024  | 3.024  | 3.0378 | 0.8692 |
| 2010/09                    | 720  | 1008.396 | 1005.54  | 0.9922 | -2.8566 | 2.8566 | 2.8862 | 0.8411 |
| 2010/10                    | 744  | 1011.749 | 1008.927 | 0.9943 | -2.8226 | 2.8225 | 2.868  | 0.9164 |
| 2010/11                    | 720  | 1014.387 | 1011.758 | 0.9927 | -2.6288 | 2.6289 | 2.6819 | 0.9151 |
| 2010/12                    | 744  | 1008.636 | 1006.006 | 0.9944 | -2.6306 | 2.6305 | 2.6974 | 0.9458 |
| 2011/01                    | 744  | 1014.459 | 1012.049 | 0.9918 | -2.4108 | 2.4107 | 2.4839 | 0.9337 |
| 2011/02                    | 672  | 1014.799 | 1012.025 | 0.9953 | -2.7744 | 2.7744 | 2.8284 | 0.9418 |
| all                        | 8760 | 1010.641 | 1007.831 | 0.9961 | -2.8102 | 2.8102 | 2.8621 | 0.9484 |
| <b>Takamatsu</b>           |      |          |          |        |         |        |        |        |
|                            | N    | obs_ave  | sim_ave  | R      | MBE     | MAE    | RMSE   | IA     |
| 2010/03                    | 744  | 1017.23  | 1017.256 | 0.9956 | 0.0257  | 0.489  | 0.6322 | 0.9978 |
| 2010/04                    | 720  | 1016.154 | 1016.155 | 0.995  | 0.001   | 0.4322 | 0.5761 | 0.9975 |
| 2010/05                    | 744  | 1010.366 | 1010.294 | 0.9958 | -0.0724 | 0.38   | 0.5411 | 0.9978 |
| 2010/06                    | 720  | 1009.205 | 1008.942 | 0.9933 | -0.2635 | 0.422  | 0.5624 | 0.9954 |
| 2010/07                    | 744  | 1008.554 | 1008.103 | 0.9974 | -0.4506 | 0.5017 | 0.628  | 0.9974 |
| 2010/08                    | 744  | 1011.456 | 1011.165 | 0.9947 | -0.2914 | 0.3945 | 0.4835 | 0.9958 |
| 2010/09                    | 720  | 1011.378 | 1011.3   | 0.9926 | -0.078  | 0.3082 | 0.3935 | 0.9961 |
| 2010/10                    | 744  | 1014.852 | 1014.823 | 0.995  | -0.0289 | 0.3622 | 0.4722 | 0.9975 |
| 2010/11                    | 720  | 1017.726 | 1018.03  | 0.993  | 0.3047  | 0.4448 | 0.5882 | 0.9952 |
| 2010/12                    | 744  | 1012.234 | 1012.647 | 0.9907 | 0.4133  | 0.6315 | 0.8345 | 0.9938 |
| 2011/01                    | 744  | 1018.487 | 1019.155 | 0.9938 | 0.6673  | 0.7138 | 0.8365 | 0.9915 |
| 2011/02                    | 672  | 1018.129 | 1018.279 | 0.9955 | 0.1498  | 0.435  | 0.5558 | 0.9976 |
| all                        | 8760 | 1013.781 | 1013.812 | 0.9956 | 0.0309  | 0.4604 | 0.6065 | 0.9976 |
| <b>Kobe</b>                |      |          |          |        |         |        |        |        |
|                            | N    | obs_ave  | sim_ave  | R      | MBE     | MAE    | RMSE   | IA     |
| 2010/03                    | 744  | 1014.8   | 1005.885 | 0.9952 | -8.9149 | 8.9148 | 8.9413 | 0.7215 |
| 2010/04                    | 720  | 1014.129 | 1005.367 | 0.9943 | -8.7621 | 8.7621 | 8.7838 | 0.6662 |
| 2010/05                    | 744  | 1008.675 | 1000.029 | 0.9962 | -8.6465 | 8.6465 | 8.6608 | 0.6607 |
| 2010/06                    | 720  | 1007.688 | 999.0294 | 0.9949 | -8.6588 | 8.6588 | 8.6692 | 0.5703 |
| 2010/07                    | 744  | 1007.116 | 998.4913 | 0.9977 | -8.6242 | 8.6242 | 8.6348 | 0.7082 |
| 2010/08                    | 744  | 1010.244 | 1001.683 | 0.997  | -8.5613 | 8.5613 | 8.5664 | 0.5364 |
| 2010/09                    | 720  | 1009.4   | 1000.868 | 0.9906 | -8.5315 | 8.5315 | 8.5439 | 0.4697 |
| 2010/10                    | 744  | 1012.566 | 1003.961 | 0.9933 | -8.6049 | 8.6048 | 8.6222 | 0.6091 |

|         |      |          |          |        |         |        |        |        |
|---------|------|----------|----------|--------|---------|--------|--------|--------|
| 2010/11 | 720  | 1015.303 | 1006.731 | 0.9904 | -8.5717 | 8.5717 | 8.5936 | 0.593  |
| 2010/12 | 744  | 1009.527 | 1000.996 | 0.9944 | -8.5316 | 8.5316 | 8.5533 | 0.6725 |
| 2011/01 | 744  | 1015.309 | 1006.782 | 0.9931 | -8.5278 | 8.5278 | 8.546  | 0.6097 |
| 2011/02 | 672  | 1015.749 | 1006.845 | 0.9943 | -8.9038 | 8.9038 | 8.9249 | 0.6698 |
| all     | 8760 | 1011.677 | 1003.025 | 0.9959 | -8.6514 | 8.6514 | 8.6692 | 0.6894 |

**Table S3** – Monthly validation of WRF results in different AMeDAS stations of the domain for temperature, wind speed, and relative humidity

| Temperature (°C) |      |         |         |        |         |        |        |        |
|------------------|------|---------|---------|--------|---------|--------|--------|--------|
| <b>Fukuoka</b>   |      |         |         |        |         |        |        |        |
|                  | N    | obs_ave | sim_ave | R      | MBE     | MAE    | RMSE   | IA     |
| 2010/03          | 744  | 10.8407 | 11.1955 | 0.9301 | 0.3548  | 1.157  | 1.5792 | 0.9596 |
| 2010/04          | 720  | 13.7851 | 14.456  | 0.9312 | 0.6709  | 1.2314 | 1.615  | 0.9481 |
| 2010/05          | 744  | 19.2297 | 20.2961 | 0.9081 | 1.0664  | 1.3965 | 1.9428 | 0.9261 |
| 2010/06          | 720  | 23.49   | 25.2251 | 0.8545 | 1.7351  | 1.9122 | 2.3202 | 0.8319 |
| 2010/07          | 744  | 27.6606 | 29.0387 | 0.8894 | 1.3781  | 1.5189 | 1.8938 | 0.8851 |
| 2010/08          | 744  | 30.3095 | 31.4481 | 0.866  | 1.1386  | 1.3517 | 1.7549 | 0.881  |
| 2010/09          | 720  | 26.3061 | 27.1081 | 0.9518 | 0.802   | 1.1819 | 1.5254 | 0.9629 |
| 2010/10          | 744  | 20.0118 | 20.5822 | 0.9387 | 0.5703  | 1.0866 | 1.3577 | 0.9598 |
| 2010/11          | 720  | 13.1989 | 13.7889 | 0.8954 | 0.59    | 1.1689 | 1.5297 | 0.9363 |
| 2010/12          | 744  | 8.7493  | 9.0553  | 0.9406 | 0.306   | 1.082  | 1.3632 | 0.9679 |
| 2011/01          | 744  | 3.7753  | 3.9477  | 0.8404 | 0.1724  | 0.8888 | 1.142  | 0.9134 |
| 2011/02          | 672  | 8.1749  | 8.4734  | 0.9468 | 0.2985  | 1.0151 | 1.3576 | 0.9696 |
| all              | 8760 | 17.1786 | 17.9372 | 0.9884 | 0.7586  | 1.2498 | 1.6448 | 0.9918 |
| <b>Hiroshima</b> |      |         |         |        |         |        |        |        |
|                  | N    | obs_ave | sim_ave | R      | MBE     | MAE    | RMSE   | IA     |
| 2010/03          | 744  | 9.0634  | 9.0106  | 0.9046 | -0.0529 | 1.2827 | 1.6561 | 0.9501 |
| 2010/04          | 720  | 13.0058 | 13.0793 | 0.9329 | 0.0735  | 1.111  | 1.4062 | 0.9652 |
| 2010/05          | 744  | 18.47   | 18.542  | 0.9132 | 0.072   | 1.2438 | 1.5439 | 0.9546 |
| 2010/06          | 720  | 23.3139 | 23.5128 | 0.8841 | 0.1989  | 1.1214 | 1.3987 | 0.9367 |
| 2010/07          | 744  | 27.2352 | 26.8445 | 0.8489 | -0.3907 | 1.2106 | 1.479  | 0.9119 |
| 2010/08          | 744  | 30.3329 | 29.1122 | 0.9146 | -1.2207 | 1.3922 | 1.6018 | 0.9014 |
| 2010/09          | 720  | 26.1672 | 25.4344 | 0.9617 | -0.7328 | 1.1717 | 1.4101 | 0.9687 |
| 2010/10          | 744  | 19.2515 | 19.2382 | 0.9478 | -0.0133 | 0.9804 | 1.26   | 0.9731 |
| 2010/11          | 720  | 11.9494 | 11.9816 | 0.9156 | 0.0321  | 1.1961 | 1.4732 | 0.9541 |
| 2010/12          | 744  | 7.3008  | 7.1945  | 0.9199 | -0.1063 | 1.3194 | 1.6385 | 0.9579 |
| 2011/01          | 744  | 2.8687  | 2.2801  | 0.9099 | -0.5885 | 1.133  | 1.4012 | 0.9325 |
| 2011/02          | 672  | 6.6167  | 6.4204  | 0.9386 | -0.1963 | 1.1522 | 1.4301 | 0.9679 |
| all              | 8760 | 16.3522 | 16.1066 | 0.988  | -0.2456 | 1.1937 | 1.4801 | 0.9937 |

| <b>Kagoshima</b> |      |         |         |        |         |        |        |        |
|------------------|------|---------|---------|--------|---------|--------|--------|--------|
|                  | N    | obs_ave | sim_ave | R      | MBE     | MAE    | RMSE   | IA     |
| 2010/03          | 744  | 9.9921  | 9.852   | 0.9339 | -0.1401 | 1.1793 | 1.4901 | 0.963  |
| 2010/04          | 720  | 13.4388 | 13.4935 | 0.9354 | 0.0547  | 1.1084 | 1.3984 | 0.9648 |
| 2010/05          | 744  | 18.691  | 18.3638 | 0.906  | -0.3272 | 1.2865 | 1.6023 | 0.9474 |
| 2010/06          | 720  | 23.4257 | 23.5542 | 0.9086 | 0.1285  | 1.0455 | 1.2878 | 0.9484 |
| 2010/07          | 744  | 27.1165 | 26.7843 | 0.8597 | -0.3322 | 1.079  | 1.3254 | 0.916  |
| 2010/08          | 744  | 29.4478 | 28.7312 | 0.874  | -0.7166 | 1.0984 | 1.2964 | 0.9053 |
| 2010/09          | 720  | 26.2022 | 25.6661 | 0.9529 | -0.5361 | 1.2148 | 1.4346 | 0.9605 |
| 2010/10          | 744  | 19.6843 | 20.3608 | 0.9137 | 0.6765  | 1.2147 | 1.5726 | 0.9455 |
| 2010/11          | 720  | 13.0482 | 13.1609 | 0.8721 | 0.1127  | 1.2825 | 1.6089 | 0.9296 |
| 2010/12          | 744  | 9.0574  | 8.9053  | 0.8947 | -0.1521 | 1.4878 | 1.8427 | 0.9439 |
| 2011/01          | 744  | 4.2582  | 3.8152  | 0.8279 | -0.443  | 1.1502 | 1.3921 | 0.8953 |
| 2011/02          | 672  | 7.1874  | 7.232   | 0.946  | 0.0446  | 1.0644 | 1.3756 | 0.9723 |
| all              | 8760 | 16.8503 | 16.7121 | 0.986  | -0.1382 | 1.1855 | 1.4784 | 0.9928 |
| <b>Kochi</b>     |      |         |         |        |         |        |        |        |
|                  | N    | obs_ave | sim_ave | R      | MBE     | MAE    | RMSE   | IA     |
| 2010/03          | 744  | 11.4407 | 11.4875 | 0.9154 | 0.0467  | 1.3174 | 1.6049 | 0.9559 |
| 2010/04          | 720  | 14.7792 | 14.7544 | 0.9101 | -0.0247 | 1.2365 | 1.5494 | 0.9512 |
| 2010/05          | 744  | 19.3755 | 19.616  | 0.8535 | 0.2404  | 1.4614 | 1.8183 | 0.9138 |
| 2010/06          | 720  | 23.2818 | 23.7735 | 0.9151 | 0.4917  | 1.1254 | 1.4    | 0.9345 |
| 2010/07          | 744  | 27.0065 | 27.1375 | 0.8544 | 0.131   | 0.9386 | 1.1905 | 0.9108 |
| 2010/08          | 744  | 29.0664 | 28.8437 | 0.8652 | -0.2227 | 1.0638 | 1.2392 | 0.9016 |
| 2010/09          | 720  | 26.425  | 26.3749 | 0.9189 | -0.0501 | 1.2105 | 1.4472 | 0.954  |
| 2010/10          | 744  | 20.6676 | 21.0016 | 0.8789 | 0.334   | 1.3692 | 1.6617 | 0.9341 |
| 2010/11          | 720  | 13.5071 | 14.0022 | 0.8978 | 0.4952  | 1.4875 | 1.7643 | 0.9356 |
| 2010/12          | 744  | 8.7152  | 9.0489  | 0.9212 | 0.3337  | 1.5575 | 1.8827 | 0.9576 |
| 2011/01          | 744  | 4.2507  | 3.8262  | 0.933  | -0.4244 | 1.2851 | 1.5209 | 0.9463 |
| 2011/02          | 672  | 8.9092  | 8.6604  | 0.9338 | -0.2489 | 1.4243 | 1.6966 | 0.9619 |
| all              | 8760 | 17.33   | 17.4231 | 0.9833 | 0.0931  | 1.2889 | 1.5778 | 0.9915 |
| <b>Nagoya</b>    |      |         |         |        |         |        |        |        |
|                  | N    | obs_ave | sim_ave | R      | MBE     | MAE    | RMSE   | IA     |
| 2010/03          | 744  | 9.084   | 10.402  | 0.9424 | 1.318   | 1.4387 | 1.8232 | 0.9386 |
| 2010/04          | 720  | 13.2939 | 14.4682 | 0.9412 | 1.1743  | 1.3988 | 1.7824 | 0.9483 |
| 2010/05          | 744  | 18.6645 | 20.1528 | 0.9692 | 1.4883  | 1.5413 | 1.8177 | 0.9533 |
| 2010/06          | 720  | 23.9228 | 25.8141 | 0.9599 | 1.8913  | 1.9157 | 2.1393 | 0.9134 |
| 2010/07          | 744  | 27.8321 | 29.9264 | 0.9492 | 2.0943  | 2.1107 | 2.3658 | 0.8932 |
| 2010/08          | 744  | 29.3614 | 31.3064 | 0.9362 | 1.945   | 1.9845 | 2.1891 | 0.859  |
| 2010/09          | 720  | 26.0636 | 27.8868 | 0.9759 | 1.8232  | 1.8465 | 2.0923 | 0.9473 |
| 2010/10          | 744  | 19.4146 | 21.2389 | 0.9546 | 1.8242  | 1.8971 | 2.1421 | 0.9211 |
| 2010/11          | 720  | 12.0426 | 13.2416 | 0.9484 | 1.199   | 1.3723 | 1.5957 | 0.9409 |

|                 |      |         |         |        |         |        |        |        |
|-----------------|------|---------|---------|--------|---------|--------|--------|--------|
| 2010/12         | 744  | 7.8526  | 8.3459  | 0.9621 | 0.4933  | 0.9677 | 1.2519 | 0.977  |
| 2011/01         | 744  | 2.7742  | 2.4667  | 0.9196 | -0.3075 | 0.86   | 1.1162 | 0.9551 |
| 2011/02         | 672  | 6.6037  | 6.7166  | 0.9372 | 0.1129  | 1.1841 | 1.5109 | 0.966  |
| all             | 8760 | 16.4632 | 17.7244 | 0.9924 | 1.2611  | 1.5451 | 1.8589 | 0.9909 |
| <b>Nobeoka</b>  |      |         |         |        |         |        |        |        |
|                 | N    | obs_ave | sim_ave | R      | MBE     | MAE    | RMSE   | IA     |
| 2010/03         | 743  | 11.1802 | 11.078  | 0.9123 | -0.1022 | 1.4633 | 1.8332 | 0.9544 |
| 2010/04         | 720  | 14.1997 | 14.5013 | 0.9196 | 0.3016  | 1.3277 | 1.6575 | 0.9565 |
| 2010/05         | 744  | 18.8647 | 19.6277 | 0.8637 | 0.7631  | 1.6403 | 2.087  | 0.9083 |
| 2010/06         | 720  | 22.1306 | 23.4752 | 0.8965 | 1.3446  | 1.6    | 1.9866 | 0.905  |
| 2010/07         | 744  | 26.2079 | 27.4129 | 0.8612 | 1.205   | 1.4334 | 1.7581 | 0.8714 |
| 2010/08         | 744  | 27.9157 | 28.3856 | 0.7834 | 0.4699  | 1.3795 | 1.7083 | 0.8704 |
| 2010/09         | 720  | 25.2125 | 25.7847 | 0.9127 | 0.5722  | 1.3151 | 1.6036 | 0.9477 |
| 2010/10         | 744  | 19.5001 | 19.7307 | 0.861  | 0.2306  | 1.4987 | 1.8355 | 0.9248 |
| 2010/11         | 720  | 12.7678 | 13.4319 | 0.8951 | 0.6641  | 1.6435 | 1.9914 | 0.9253 |
| 2010/12         | 744  | 8.653   | 8.718   | 0.9116 | 0.065   | 1.5638 | 1.9349 | 0.9541 |
| 2011/01         | 744  | 4.1817  | 3.518   | 0.9215 | -0.6637 | 1.2439 | 1.497  | 0.9477 |
| 2011/02         | 672  | 8.654   | 8.7563  | 0.9047 | 0.1023  | 1.6485 | 1.9551 | 0.9482 |
| all             | 8759 | 16.667  | 17.0789 | 0.9786 | 0.4119  | 1.4785 | 1.8278 | 0.9883 |
| <b>Totori</b>   |      |         |         |        |         |        |        |        |
|                 | N    | obs_ave | sim_ave | R      | MBE     | MAE    | RMSE   | IA     |
| 2010/03         | 744  | 7.9973  | 8.1835  | 0.9437 | 0.1862  | 1.1548 | 1.5012 | 0.9635 |
| 2010/04         | 720  | 11.6389 | 12.1506 | 0.93   | 0.5117  | 1.4701 | 1.9453 | 0.9435 |
| 2010/05         | 744  | 17.0681 | 17.982  | 0.9148 | 0.9138  | 1.5707 | 2.1341 | 0.9423 |
| 2010/06         | 720  | 22.1056 | 23.4691 | 0.9009 | 1.3636  | 1.8012 | 2.2867 | 0.8945 |
| 2010/07         | 744  | 26.728  | 27.4627 | 0.9156 | 0.7347  | 1.2393 | 1.532  | 0.9331 |
| 2010/08         | 744  | 29.8306 | 30.0057 | 0.838  | 0.175   | 1.3938 | 1.7123 | 0.8988 |
| 2010/09         | 720  | 24.6797 | 25.438  | 0.953  | 0.7583  | 1.4713 | 1.7661 | 0.9597 |
| 2010/10         | 744  | 17.7598 | 18.7874 | 0.9266 | 1.0276  | 1.5079 | 1.8573 | 0.9363 |
| 2010/11         | 720  | 11.1808 | 12.0754 | 0.8957 | 0.8946  | 1.6578 | 1.9923 | 0.9158 |
| 2010/12         | 744  | 7.104   | 7.3314  | 0.8972 | 0.2274  | 1.6371 | 1.9572 | 0.9453 |
| 2011/01         | 744  | 1.5379  | 1.4271  | 0.6395 | -0.1108 | 1.3444 | 1.7936 | 0.7957 |
| 2011/02         | 672  | 5.0402  | 5.529   | 0.8851 | 0.4888  | 1.5986 | 2.0602 | 0.9351 |
| all             | 8760 | 15.2824 | 15.8778 | 0.9828 | 0.5954  | 1.4851 | 1.8887 | 0.9904 |
| <b>Wakayama</b> |      |         |         |        |         |        |        |        |
|                 | N    | obs_ave | sim_ave | R      | MBE     | MAE    | RMSE   | IA     |
| 2010/03         | 744  | 9.9921  | 9.852   | 0.9339 | -0.1401 | 1.1793 | 1.4901 | 0.963  |
| 2010/04         | 720  | 13.4388 | 13.4935 | 0.9354 | 0.0547  | 1.1084 | 1.3984 | 0.9648 |
| 2010/05         | 744  | 18.691  | 18.3638 | 0.906  | -0.3272 | 1.2865 | 1.6023 | 0.9474 |
| 2010/06         | 720  | 23.4257 | 23.5542 | 0.9086 | 0.1285  | 1.0455 | 1.2878 | 0.9484 |
| 2010/07         | 744  | 27.1165 | 26.7843 | 0.8597 | -0.3322 | 1.079  | 1.3254 | 0.916  |

|         |      |         |         |        |         |        |        |        |
|---------|------|---------|---------|--------|---------|--------|--------|--------|
| 2010/08 | 744  | 29.4478 | 28.7312 | 0.874  | -0.7166 | 1.0984 | 1.2964 | 0.9053 |
| 2010/09 | 720  | 26.2022 | 25.6661 | 0.9529 | -0.5361 | 1.2148 | 1.4346 | 0.9605 |
| 2010/10 | 744  | 19.6843 | 20.3608 | 0.9137 | 0.6765  | 1.2147 | 1.5726 | 0.9455 |
| 2010/11 | 720  | 13.0482 | 13.1609 | 0.8721 | 0.1127  | 1.2825 | 1.6089 | 0.9296 |
| 2010/12 | 744  | 9.0574  | 8.9053  | 0.8947 | -0.1521 | 1.4878 | 1.8427 | 0.9439 |
| 2011/01 | 744  | 4.2582  | 3.8152  | 0.8279 | -0.443  | 1.1502 | 1.3921 | 0.8953 |
| 2011/02 | 672  | 7.1874  | 7.232   | 0.946  | 0.0446  | 1.0644 | 1.3756 | 0.9723 |
| all     | 8760 | 16.8503 | 16.7121 | 0.986  | -0.1382 | 1.1855 | 1.4784 | 0.9928 |

### Wind Speed (m/s)

| Fukuoka |      |         |         |        |        |        |        |        |
|---------|------|---------|---------|--------|--------|--------|--------|--------|
|         | N    | obs_ave | sim_ave | R      | MBE    | MAE    | RMSE   | IA     |
| 2010/03 | 744  | 3.5372  | 3.8966  | 0.691  | 0.3593 | 1.2247 | 1.5719 | 0.8193 |
| 2010/04 | 720  | 3.1307  | 3.4932  | 0.7519 | 0.3625 | 1.0796 | 1.4125 | 0.8571 |
| 2010/05 | 744  | 2.9976  | 3.1499  | 0.7608 | 0.1523 | 0.9962 | 1.2868 | 0.8664 |
| 2010/06 | 720  | 2.3182  | 2.5981  | 0.5356 | 0.2799 | 1.0085 | 1.3093 | 0.7275 |
| 2010/07 | 744  | 2.5168  | 2.6898  | 0.5693 | 0.173  | 1.0119 | 1.3219 | 0.7546 |
| 2010/08 | 744  | 2.8968  | 3.0274  | 0.6078 | 0.1306 | 1.1103 | 1.4354 | 0.7829 |
| 2010/09 | 720  | 2.8299  | 3.1812  | 0.698  | 0.3514 | 1.0811 | 1.4196 | 0.8249 |
| 2010/10 | 744  | 2.6901  | 3.0978  | 0.743  | 0.4078 | 1.0354 | 1.3156 | 0.8468 |
| 2010/11 | 720  | 2.5117  | 2.6942  | 0.7639 | 0.1825 | 0.8656 | 1.1663 | 0.8688 |
| 2010/12 | 744  | 3.3001  | 3.932   | 0.7695 | 0.6319 | 1.256  | 1.654  | 0.8542 |
| 2011/01 | 744  | 3.1616  | 4.0465  | 0.7968 | 0.885  | 1.2646 | 1.6154 | 0.8498 |
| 2011/02 | 671  | 2.7508  | 2.8448  | 0.8187 | 0.094  | 0.9175 | 1.1975 | 0.8993 |
| all     | 8759 | 2.89    | 3.2266  | 0.7321 | 0.3366 | 1.0729 | 1.4026 | 0.8465 |

| Hiroshima |      |         |         |        |         |        |        |        |
|-----------|------|---------|---------|--------|---------|--------|--------|--------|
|           | N    | obs_ave | sim_ave | R      | MBE     | MAE    | RMSE   | IA     |
| 2010/03   | 744  | 3.8493  | 3.1181  | 0.5234 | -0.7312 | 1.6309 | 2.0465 | 0.6979 |
| 2010/04   | 720  | 3.6426  | 2.8964  | 0.5229 | -0.7462 | 1.5538 | 1.9535 | 0.6865 |
| 2010/05   | 744  | 3.4406  | 2.8494  | 0.3003 | -0.5911 | 1.6493 | 2.0957 | 0.5807 |
| 2010/06   | 720  | 2.9443  | 2.3652  | 0.2105 | -0.5791 | 1.3412 | 1.7803 | 0.5368 |
| 2010/07   | 743  | 2.9027  | 2.8174  | 0.5239 | -0.0853 | 1.1192 | 1.4673 | 0.7273 |
| 2010/08   | 744  | 3.2078  | 2.7909  | 0.624  | -0.4169 | 1.106  | 1.3712 | 0.7691 |
| 2010/09   | 719  | 3.8127  | 3.032   | 0.6266 | -0.7806 | 1.3151 | 1.6475 | 0.7355 |
| 2010/10   | 744  | 3.9327  | 2.7737  | 0.5678 | -1.159  | 1.5298 | 1.9047 | 0.6728 |
| 2010/11   | 720  | 3.9799  | 2.4662  | 0.3382 | -1.5137 | 2.019  | 2.4715 | 0.5569 |
| 2010/12   | 744  | 3.7672  | 2.7049  | 0.3315 | -1.0623 | 1.9484 | 2.4314 | 0.5829 |
| 2011/01   | 744  | 2.9824  | 2.5471  | 0.1855 | -0.4353 | 1.5846 | 1.9556 | 0.5129 |
| 2011/02   | 672  | 3.7266  | 2.4838  | 0.5618 | -1.2428 | 1.6238 | 2.0626 | 0.6838 |
| all       | 8758 | 3.5132  | 2.7396  | 0.4411 | -0.7735 | 1.5342 | 1.9576 | 0.6487 |

| <b>Kagoshima</b> |      |         |         |        |         |        |        |        |
|------------------|------|---------|---------|--------|---------|--------|--------|--------|
|                  | N    | obs_ave | sim_ave | R      | MBE     | MAE    | RMSE   | IA     |
| 2010/03          | 743  | 3.3903  | 3.5056  | 0.7054 | 0.1153  | 1.2172 | 1.5358 | 0.8367 |
| 2010/04          | 720  | 3.3472  | 3.468   | 0.5378 | 0.1208  | 1.2451 | 1.5907 | 0.7346 |
| 2010/05          | 744  | 3.0698  | 3.1034  | 0.5555 | 0.0337  | 1.1693 | 1.4747 | 0.7467 |
| 2010/06          | 720  | 3.026   | 3.0925  | 0.4983 | 0.0665  | 1.2436 | 1.614  | 0.692  |
| 2010/07          | 744  | 2.7789  | 3.0595  | 0.6517 | 0.2806  | 1.0232 | 1.2688 | 0.7916 |
| 2010/08          | 744  | 3.3757  | 3.5701  | 0.716  | 0.1944  | 1.0344 | 1.317  | 0.8422 |
| 2010/09          | 720  | 3.0989  | 3.079   | 0.6984 | -0.0199 | 1.067  | 1.3319 | 0.8303 |
| 2010/10          | 744  | 3.345   | 3.1103  | 0.5854 | -0.2347 | 1.2244 | 1.551  | 0.7569 |
| 2010/11          | 720  | 3.1121  | 2.587   | 0.5044 | -0.525  | 1.1677 | 1.4398 | 0.6954 |
| 2010/12          | 732  | 3.4148  | 3.1773  | 0.6175 | -0.2375 | 1.3168 | 1.7058 | 0.7816 |
| 2011/01          | 739  | 3.5277  | 3.1158  | 0.6185 | -0.412  | 1.2383 | 1.5657 | 0.7727 |
| 2011/02          | 671  | 3.1861  | 2.6896  | 0.4284 | -0.4966 | 1.3929 | 1.6964 | 0.6486 |
| all              | 8741 | 3.2234  | 3.1342  | 0.5986 | -0.0892 | 1.1933 | 1.5122 | 0.7728 |
| <b>Kochi</b>     |      |         |         |        |         |        |        |        |
|                  | N    | obs_ave | sim_ave | R      | MBE     | MAE    | RMSE   | IA     |
| 2010/03          | 744  | 1.7458  | 3.3087  | 0.3014 | 1.5629  | 1.8818 | 2.7716 | 0.4118 |
| 2010/04          | 720  | 1.7992  | 3.1324  | 0.4135 | 1.3333  | 1.6177 | 2.3522 | 0.4827 |
| 2010/05          | 744  | 1.745   | 2.5454  | 0.442  | 0.8004  | 1.1804 | 1.6575 | 0.5374 |
| 2010/06          | 720  | 1.6276  | 2.2762  | 0.3937 | 0.6486  | 1.0538 | 1.4744 | 0.5505 |
| 2010/07          | 744  | 1.5313  | 2.2509  | 0.3878 | 0.7196  | 1.0451 | 1.5047 | 0.5039 |
| 2010/08          | 744  | 1.7329  | 2.3519  | 0.4501 | 0.619   | 0.9693 | 1.2617 | 0.5982 |
| 2010/09          | 720  | 1.7706  | 2.5868  | 0.3918 | 0.8163  | 1.3256 | 1.9835 | 0.4754 |
| 2010/10          | 744  | 1.603   | 3.0069  | 0.3502 | 1.4039  | 1.704  | 2.381  | 0.3986 |
| 2010/11          | 720  | 1.7121  | 2.5043  | 0.3414 | 0.7922  | 1.2273 | 1.7504 | 0.4738 |
| 2010/12          | 743  | 1.7734  | 2.722   | 0.3964 | 0.9487  | 1.3304 | 1.9844 | 0.5108 |
| 2011/01          | 744  | 1.7337  | 2.6592  | 0.5122 | 0.9254  | 1.2777 | 1.667  | 0.6174 |
| 2011/02          | 672  | 1.6071  | 2.7419  | 0.4109 | 1.1347  | 1.3687 | 1.848  | 0.5018 |
| all              | 8759 | 1.6989  | 2.6739  | 0.388  | 0.975   | 1.3318 | 1.9328 | 0.4929 |
| <b>Nagoya</b>    |      |         |         |        |         |        |        |        |
|                  | N    | obs_ave | sim_ave | R      | MBE     | MAE    | RMSE   | IA     |
| 2010/03          | 743  | 3.2637  | 3.4462  | 0.7512 | 0.1825  | 1.0949 | 1.4318 | 0.8607 |
| 2010/04          | 720  | 3.4068  | 3.5777  | 0.7673 | 0.1709  | 1.0217 | 1.3428 | 0.8727 |
| 2010/05          | 744  | 3.4784  | 3.6268  | 0.7988 | 0.1485  | 0.9406 | 1.2326 | 0.8911 |
| 2010/06          | 720  | 2.5772  | 2.7291  | 0.6691 | 0.1519  | 0.8843 | 1.1336 | 0.8139 |
| 2010/07          | 744  | 2.704   | 2.9769  | 0.6575 | 0.2729  | 0.9138 | 1.184  | 0.8025 |
| 2010/08          | 744  | 2.7034  | 2.7451  | 0.6531 | 0.0417  | 0.8153 | 1.0985 | 0.8094 |
| 2010/09          | 720  | 2.726   | 2.8959  | 0.6992 | 0.1699  | 0.8682 | 1.1065 | 0.8291 |
| 2010/10          | 744  | 2.387   | 2.6603  | 0.697  | 0.2733  | 0.9311 | 1.1863 | 0.8242 |
| 2010/11          | 720  | 2.5987  | 2.7954  | 0.7668 | 0.1967  | 0.9002 | 1.1707 | 0.8712 |

|                 |      |         |         |        |         |        |        |        |
|-----------------|------|---------|---------|--------|---------|--------|--------|--------|
| 2010/12         | 744  | 2.9187  | 3.2437  | 0.7016 | 0.325   | 1.1691 | 1.5519 | 0.8265 |
| 2011/01         | 744  | 3.1694  | 3.4788  | 0.6558 | 0.3095  | 1.1112 | 1.462  | 0.8015 |
| 2011/02         | 672  | 2.9153  | 2.7707  | 0.8222 | -0.1446 | 0.8877 | 1.1479 | 0.9035 |
| all             | 8759 | 2.9047  | 3.0822  | 0.7383 | 0.1775  | 0.9626 | 1.2643 | 0.8551 |
| <b>Nobeoka</b>  |      |         |         |        |         |        |        |        |
|                 | N    | obs_ave | sim_ave | R      | MBE     | MAE    | RMSE   | IA     |
| 2010/03         | 742  | 3.0655  | 3.728   | 0.4828 | 0.6625  | 1.7965 | 2.4113 | 0.6825 |
| 2010/04         | 720  | 2.7399  | 3.2265  | 0.4768 | 0.4866  | 1.5487 | 2.0328 | 0.6843 |
| 2010/05         | 744  | 2.3031  | 2.9369  | 0.425  | 0.6338  | 1.2374 | 1.6669 | 0.6505 |
| 2010/06         | 720  | 1.8507  | 2.6761  | 0.3954 | 0.8254  | 1.353  | 1.738  | 0.6047 |
| 2010/07         | 744  | 1.6634  | 2.56    | 0.2051 | 0.8966  | 1.3276 | 1.74   | 0.4778 |
| 2010/08         | 744  | 2.3656  | 2.9792  | 0.5058 | 0.6136  | 1.1048 | 1.4368 | 0.6895 |
| 2010/09         | 720  | 2.331   | 3.0192  | 0.6115 | 0.6883  | 1.2203 | 1.6639 | 0.7369 |
| 2010/10         | 744  | 2.7371  | 3.4616  | 0.6602 | 0.7245  | 1.4228 | 1.8569 | 0.7935 |
| 2010/11         | 720  | 2.7144  | 2.5688  | 0.3058 | -0.1457 | 1.3782 | 1.877  | 0.5857 |
| 2010/12         | 744  | 3.4449  | 2.661   | 0.2991 | -0.7839 | 1.7642 | 2.3946 | 0.56   |
| 2011/01         | 744  | 3.5163  | 2.8056  | 0.5135 | -0.7106 | 1.6276 | 2.1909 | 0.6703 |
| 2011/02         | 672  | 2.7967  | 3.1399  | 0.5789 | 0.3431  | 1.292  | 1.6638 | 0.7558 |
| all             | 8758 | 2.6283  | 2.9799  | 0.4539 | 0.3516  | 1.4243 | 1.9149 | 0.6772 |
| <b>Totori</b>   |      |         |         |        |         |        |        |        |
|                 | N    | obs_ave | sim_ave | R      | MBE     | MAE    | RMSE   | IA     |
| 2010/03         | 742  | 3.6704  | 4.5191  | 0.7079 | 0.8487  | 1.5521 | 1.9922 | 0.8146 |
| 2010/04         | 720  | 3.2003  | 3.9325  | 0.649  | 0.7322  | 1.3391 | 1.767  | 0.776  |
| 2010/05         | 744  | 3.234   | 3.5923  | 0.6475 | 0.3583  | 1.2429 | 1.6    | 0.7945 |
| 2010/06         | 719  | 2.4922  | 2.2573  | 0.3796 | -0.2349 | 1.1229 | 1.4137 | 0.6256 |
| 2010/07         | 744  | 2.6758  | 2.5773  | 0.538  | -0.0985 | 1.0933 | 1.4013 | 0.7357 |
| 2010/08         | 744  | 3.246   | 3.2163  | 0.6489 | -0.0297 | 1.0753 | 1.3825 | 0.8    |
| 2010/09         | 719  | 2.8243  | 3.1676  | 0.6188 | 0.3432  | 1.1267 | 1.4717 | 0.7733 |
| 2010/10         | 744  | 2.3755  | 2.9895  | 0.6092 | 0.6139  | 1.2193 | 1.6298 | 0.7435 |
| 2010/11         | 719  | 2.9229  | 3.4769  | 0.5649 | 0.5539  | 1.2775 | 1.7033 | 0.7327 |
| 2010/12         | 744  | 3.4739  | 4.1475  | 0.5758 | 0.6736  | 1.4823 | 1.9204 | 0.7413 |
| 2011/01         | 744  | 2.8741  | 3.7583  | 0.5138 | 0.8843  | 1.5226 | 1.9977 | 0.6794 |
| 2011/02         | 672  | 2.7808  | 3.4497  | 0.6045 | 0.6689  | 1.2701 | 1.6721 | 0.7428 |
| all             | 8755 | 2.9837  | 3.4257  | 0.6172 | 0.442   | 1.2777 | 1.6772 | 0.7714 |
| <b>Wakayama</b> |      |         |         |        |         |        |        |        |
|                 | N    | obs_ave | sim_ave | R      | MBE     | MAE    | RMSE   | IA     |
| 2010/03         | 744  | 4.4499  | 4.8283  | 0.7215 | 0.3784  | 1.4471 | 1.8335 | 0.842  |
| 2010/04         | 720  | 3.8989  | 4.0614  | 0.6483 | 0.1626  | 1.3654 | 1.7868 | 0.7972 |
| 2010/05         | 744  | 3.9958  | 3.9678  | 0.6557 | -0.028  | 1.276  | 1.7088 | 0.8048 |
| 2010/06         | 720  | 3.5344  | 3.3673  | 0.6798 | -0.1671 | 1.2473 | 1.6835 | 0.8185 |
| 2010/07         | 744  | 3.8728  | 4.0833  | 0.7233 | 0.2104  | 1.433  | 1.8399 | 0.8382 |

|         |      |        |        |        |         |        |        |        |
|---------|------|--------|--------|--------|---------|--------|--------|--------|
| 2010/08 | 744  | 3.7638 | 3.6748 | 0.6936 | -0.0891 | 1.2448 | 1.5687 | 0.8234 |
| 2010/09 | 720  | 3.5947 | 3.4202 | 0.6207 | -0.1745 | 1.329  | 1.6296 | 0.7794 |
| 2010/10 | 744  | 3.1617 | 3.3751 | 0.5746 | 0.2134  | 1.1505 | 1.4636 | 0.7587 |
| 2010/11 | 720  | 3.5453 | 3.3863 | 0.5397 | -0.1589 | 1.3725 | 1.7219 | 0.7406 |
| 2010/12 | 744  | 4.6579 | 4.8997 | 0.6947 | 0.2418  | 1.5326 | 1.9511 | 0.8286 |
| 2011/01 | 744  | 4.5517 | 5.0916 | 0.7091 | 0.5398  | 1.3639 | 1.7477 | 0.828  |
| 2011/02 | 672  | 3.6668 | 3.7127 | 0.6105 | 0.0459  | 1.3055 | 1.62   | 0.7823 |
| all     | 8760 | 3.8957 | 3.996  | 0.6808 | 0.1003  | 1.3394 | 1.7185 | 0.822  |

### Specific Humidity (g/kg)

| Fukuoka   |      |         |         |        |         |        |        |        |
|-----------|------|---------|---------|--------|---------|--------|--------|--------|
|           | N    | obs_ave | sim_ave | R      | MBE     | MAE    | RMSE   | IA     |
| 2010/03   | 744  | 5.2744  | 5.1721  | 0.9521 | -0.1023 | 0.4685 | 0.6383 | 0.975  |
| 2010/04   | 720  | 6.144   | 6.0729  | 0.9502 | -0.0711 | 0.5717 | 0.7614 | 0.9723 |
| 2010/05   | 744  | 8.9012  | 8.4724  | 0.8992 | -0.4288 | 0.8653 | 1.2036 | 0.9378 |
| 2010/06   | 720  | 13.3451 | 12.9555 | 0.9172 | -0.3896 | 0.991  | 1.3719 | 0.9433 |
| 2010/07   | 744  | 16.9123 | 16.7089 | 0.6095 | -0.2034 | 0.9644 | 1.2331 | 0.7473 |
| 2010/08   | 744  | 17.699  | 17.2972 | 0.6838 | -0.4018 | 1.1929 | 1.6024 | 0.8038 |
| 2010/09   | 720  | 14.4601 | 13.9724 | 0.9117 | -0.4878 | 1.0113 | 1.4851 | 0.9476 |
| 2010/10   | 744  | 9.5416  | 9.3118  | 0.9127 | -0.2299 | 0.7921 | 1.0494 | 0.9525 |
| 2010/11   | 720  | 5.5896  | 5.5749  | 0.8887 | -0.0147 | 0.4801 | 0.6036 | 0.9417 |
| 2010/12   | 744  | 4.5972  | 4.5553  | 0.9577 | -0.042  | 0.4159 | 0.513  | 0.9775 |
| 2011/01   | 744  | 2.9164  | 2.9917  | 0.8453 | 0.0753  | 0.3288 | 0.4206 | 0.9013 |
| 2011/02   | 672  | 4.4124  | 4.304   | 0.9213 | -0.1084 | 0.4132 | 0.5747 | 0.9575 |
| all       | 8760 | 9.1803  | 8.9796  | 0.982  | -0.2007 | 0.7097 | 1.0367 | 0.9906 |
| Hiroshima |      |         |         |        |         |        |        |        |
|           | N    | obs_ave | sim_ave | R      | MBE     | MAE    | RMSE   | IA     |
| 2010/03   | 744  | 4.5805  | 4.7353  | 0.8845 | 0.1548  | 0.5934 | 0.8909 | 0.9321 |
| 2010/04   | 720  | 5.7161  | 5.7554  | 0.9289 | 0.0393  | 0.6623 | 0.8868 | 0.9629 |
| 2010/05   | 744  | 7.7473  | 7.9221  | 0.8834 | 0.1748  | 0.8997 | 1.2913 | 0.9373 |
| 2010/06   | 720  | 12.3129 | 12.5249 | 0.9433 | 0.212   | 0.9574 | 1.1879 | 0.9642 |
| 2010/07   | 744  | 16.2432 | 16.7318 | 0.72   | 0.4887  | 0.9478 | 1.1423 | 0.7919 |
| 2010/08   | 744  | 16.7945 | 17.5397 | 0.7118 | 0.7451  | 1.0502 | 1.2381 | 0.7718 |
| 2010/09   | 720  | 13.4219 | 13.5381 | 0.9406 | 0.1163  | 0.9754 | 1.2512 | 0.9658 |
| 2010/10   | 744  | 8.9617  | 8.7019  | 0.9025 | -0.2598 | 0.7735 | 1.0407 | 0.9466 |
| 2010/11   | 720  | 5.3533  | 5.2249  | 0.8646 | -0.1284 | 0.5733 | 0.7663 | 0.9241 |
| 2010/12   | 744  | 4.2468  | 4.2361  | 0.9198 | -0.0108 | 0.4613 | 0.5964 | 0.9583 |
| 2011/01   | 744  | 2.8421  | 2.7748  | 0.7447 | -0.0673 | 0.3009 | 0.3912 | 0.8541 |
| 2011/02   | 672  | 3.7847  | 3.9622  | 0.9167 | 0.1775  | 0.4088 | 0.5726 | 0.9396 |
| all       | 8760 | 8.5315  | 8.6689  | 0.9843 | 0.1374  | 0.7187 | 0.9838 | 0.9913 |



| <b>Kagoshima</b> |      |         |         |        |         |        |        |        |
|------------------|------|---------|---------|--------|---------|--------|--------|--------|
|                  | N    | obs_ave | sim_ave | R      | MBE     | MAE    | RMSE   | IA     |
| 2010/03          | 744  | 6.8565  | 6.4862  | 0.951  | -0.3702 | 0.7347 | 0.9692 | 0.9699 |
| 2010/04          | 720  | 7.9552  | 7.4484  | 0.963  | -0.5067 | 0.7599 | 0.9756 | 0.9729 |
| 2010/05          | 744  | 10.6956 | 9.9315  | 0.88   | -0.7641 | 1.1138 | 1.5829 | 0.918  |
| 2010/06          | 719  | 14.6765 | 14.6151 | 0.9477 | -0.0614 | 0.8073 | 1.0519 | 0.973  |
| 2010/07          | 744  | 18.4681 | 17.924  | 0.7324 | -0.5441 | 0.8886 | 1.1895 | 0.8167 |
| 2010/08          | 744  | 19.1944 | 18.5132 | 0.6515 | -0.6813 | 1.0191 | 1.3148 | 0.7568 |
| 2010/09          | 720  | 16.8315 | 15.5368 | 0.9154 | -1.2947 | 1.4429 | 1.9021 | 0.9067 |
| 2010/10          | 744  | 11.2317 | 10.3923 | 0.9342 | -0.8394 | 1.0913 | 1.393  | 0.9475 |
| 2010/11          | 720  | 6.9747  | 6.2596  | 0.8879 | -0.7152 | 0.9089 | 1.1561 | 0.9093 |
| 2010/12          | 744  | 5.7888  | 5.1701  | 0.9477 | -0.6188 | 0.7557 | 0.9417 | 0.9539 |
| 2011/01          | 743  | 3.3228  | 2.8735  | 0.7762 | -0.4493 | 0.5018 | 0.6507 | 0.7971 |
| 2011/02          | 672  | 5.5984  | 5.056   | 0.9324 | -0.5424 | 0.6992 | 0.9169 | 0.9476 |
| all              | 8758 | 10.6639 | 10.0479 | 0.9833 | -0.616  | 0.8943 | 1.2152 | 0.9887 |
| <b>Kochi</b>     |      |         |         |        |         |        |        |        |
|                  | N    | obs_ave | sim_ave | R      | MBE     | MAE    | RMSE   | IA     |
| 2010/03          | 744  | 5.8645  | 5.3967  | 0.9043 | -0.4678 | 0.912  | 1.2046 | 0.942  |
| 2010/04          | 720  | 7.2923  | 6.4436  | 0.9234 | -0.8488 | 1.115  | 1.4178 | 0.9399 |
| 2010/05          | 744  | 9.7174  | 8.7925  | 0.9105 | -0.9249 | 1.2128 | 1.6292 | 0.9336 |
| 2010/06          | 720  | 14.5781 | 13.5853 | 0.9533 | -0.9928 | 1.2049 | 1.4613 | 0.9556 |
| 2010/07          | 744  | 18.5064 | 17.4447 | 0.7275 | -1.0617 | 1.2302 | 1.5395 | 0.7483 |
| 2010/08          | 744  | 19.496  | 18.4669 | 0.7121 | -1.0291 | 1.2152 | 1.4898 | 0.7459 |
| 2010/09          | 720  | 15.844  | 14.3512 | 0.9339 | -1.4928 | 1.6101 | 1.9929 | 0.9265 |
| 2010/10          | 744  | 10.7371 | 9.4673  | 0.8939 | -1.2698 | 1.4617 | 1.8337 | 0.9001 |
| 2010/11          | 720  | 6.3883  | 5.3776  | 0.8599 | -1.0107 | 1.1299 | 1.4222 | 0.8392 |
| 2010/12          | 744  | 4.7063  | 4.3467  | 0.9073 | -0.3596 | 0.668  | 0.924  | 0.9402 |
| 2011/01          | 744  | 2.6221  | 2.5342  | 0.7883 | -0.0879 | 0.2998 | 0.3982 | 0.8735 |
| 2011/02          | 672  | 4.4786  | 4.1669  | 0.9083 | -0.3117 | 0.6448 | 0.8372 | 0.9451 |
| all              | 8760 | 10.0538 | 9.231   | 0.9823 | -0.8227 | 1.0598 | 1.4132 | 0.9858 |
| <b>Nagoya</b>    |      |         |         |        |         |        |        |        |
|                  | N    | obs_ave | sim_ave | R      | MBE     | MAE    | RMSE   | IA     |
| 2010/03          | 744  | 4.4463  | 4.5166  | 0.9264 | 0.0703  | 0.5252 | 0.7574 | 0.9555 |
| 2010/04          | 720  | 5.5798  | 5.3921  | 0.94   | -0.1877 | 0.5606 | 0.7832 | 0.967  |
| 2010/05          | 744  | 7.7594  | 7.3079  | 0.9257 | -0.4514 | 0.7935 | 1.0211 | 0.953  |
| 2010/06          | 720  | 12.3655 | 12.2317 | 0.9437 | -0.1338 | 0.9005 | 1.1784 | 0.9685 |
| 2010/07          | 744  | 15.9381 | 15.5878 | 0.6858 | -0.3503 | 1.1206 | 1.4117 | 0.7965 |
| 2010/08          | 744  | 17.0994 | 16.8185 | 0.6456 | -0.2809 | 1.0092 | 1.2768 | 0.7801 |
| 2010/09          | 695  | 13.5338 | 13.1863 | 0.9149 | -0.3476 | 0.9605 | 1.2512 | 0.9512 |
| 2010/10          | 744  | 10.0538 | 8.8109  | 0.8967 | -1.2429 | 1.3003 | 1.5931 | 0.8762 |
| 2010/11          | 720  | 5.5966  | 4.8815  | 0.9011 | -0.7152 | 0.7719 | 0.9517 | 0.8902 |

|                 |      |         |         |        |         |        |        |        |
|-----------------|------|---------|---------|--------|---------|--------|--------|--------|
| 2010/12         | 744  | 4.4493  | 4.0648  | 0.931  | -0.3845 | 0.5259 | 0.667  | 0.9479 |
| 2011/01         | 744  | 3.0627  | 2.6618  | 0.6806 | -0.4009 | 0.4952 | 0.6127 | 0.7356 |
| 2011/02         | 672  | 3.7679  | 3.5338  | 0.9443 | -0.234  | 0.4597 | 0.5693 | 0.9648 |
| all             | 8735 | 8.6569  | 8.2668  | 0.9821 | -0.3901 | 0.7873 | 1.059  | 0.9895 |
| <b>Nobeoka</b>  |      |         |         |        |         |        |        |        |
|                 | N    | obs_ave | sim_ave | R      | MBE     | MAE    | RMSE   | IA     |
| 2010/03         | 743  | 5.9112  | 5.6263  | 0.9467 | -0.2849 | 0.6681 | 0.8665 | 0.9684 |
| 2010/04         | 720  | 7.4669  | 6.8903  | 0.9588 | -0.5766 | 0.833  | 1.0276 | 0.9682 |
| 2010/05         | 744  | 9.907   | 8.9575  | 0.9258 | -0.9494 | 1.1964 | 1.5217 | 0.9373 |
| 2010/06         | 720  | 14.737  | 13.5856 | 0.9166 | -1.1513 | 1.3601 | 1.6737 | 0.9218 |
| 2010/07         | 744  | 18.6586 | 17.129  | 0.5231 | -1.5296 | 1.6594 | 2.001  | 0.583  |
| 2010/08         | 744  | 19.783  | 17.9471 | 0.6341 | -1.8359 | 1.8774 | 2.2131 | 0.595  |
| 2010/09         | 720  | 16.3714 | 14.555  | 0.9344 | -1.8163 | 1.8454 | 2.1993 | 0.8982 |
| 2010/10         | 744  | 10.9551 | 9.9956  | 0.911  | -0.9595 | 1.2529 | 1.5647 | 0.928  |
| 2010/11         | 720  | 6.5495  | 5.9134  | 0.9166 | -0.6361 | 0.8092 | 1.0156 | 0.9311 |
| 2010/12         | 744  | 4.9393  | 4.6277  | 0.9505 | -0.3116 | 0.5537 | 0.7171 | 0.9685 |
| 2011/01         | 744  | 2.7301  | 2.5804  | 0.8136 | -0.1497 | 0.3114 | 0.4206 | 0.8875 |
| 2011/02         | 672  | 4.8353  | 4.5383  | 0.9273 | -0.297  | 0.6107 | 0.7869 | 0.9553 |
| all             | 8759 | 10.2705 | 9.3927  | 0.9835 | -0.8778 | 1.084  | 1.4595 | 0.9843 |
| <b>Totori</b>   |      |         |         |        |         |        |        |        |
|                 | N    | obs_ave | sim_ave | R      | MBE     | MAE    | RMSE   | IA     |
| 2010/03         | 743  | 4.6247  | 4.6401  | 0.9244 | 0.0154  | 0.4626 | 0.6002 | 0.9583 |
| 2010/04         | 720  | 5.5081  | 5.4894  | 0.9382 | -0.0187 | 0.5317 | 0.6873 | 0.9675 |
| 2010/05         | 744  | 8.0541  | 7.9154  | 0.9071 | -0.1387 | 0.7126 | 0.9816 | 0.9503 |
| 2010/06         | 720  | 12.2979 | 12.163  | 0.9338 | -0.1349 | 0.9255 | 1.2007 | 0.9626 |
| 2010/07         | 744  | 16.1616 | 16.2361 | 0.7331 | 0.0745  | 0.8242 | 1.0312 | 0.841  |
| 2010/08         | 744  | 17.4807 | 17.55   | 0.7486 | 0.0693  | 0.8835 | 1.1704 | 0.8595 |
| 2010/09         | 717  | 14.4585 | 13.6619 | 0.9222 | -0.7966 | 1.1735 | 1.4757 | 0.9444 |
| 2010/10         | 697  | 10.055  | 9.4721  | 0.8954 | -0.5829 | 0.8958 | 1.1413 | 0.9278 |
| 2010/11         | 720  | 5.8707  | 5.3995  | 0.8412 | -0.4712 | 0.6866 | 0.8686 | 0.885  |
| 2010/12         | 744  | 4.5154  | 4.5011  | 0.9021 | -0.0143 | 0.4941 | 0.6353 | 0.9478 |
| 2011/01         | 744  | 3.4205  | 3.3443  | 0.641  | -0.0762 | 0.3337 | 0.4265 | 0.7957 |
| 2011/02         | 672  | 3.9888  | 4.0012  | 0.8739 | 0.0124  | 0.471  | 0.6022 | 0.9249 |
| all             | 8709 | 8.8949  | 8.726   | 0.984  | -0.1689 | 0.6988 | 0.9503 | 0.9917 |
| <b>Wakayama</b> |      |         |         |        |         |        |        |        |
|                 | N    | obs_ave | sim_ave | R      | MBE     | MAE    | RMSE   | IA     |
| 2010/03         | 744  | 4.7932  | 5.2347  | 0.9352 | 0.4415  | 0.6175 | 0.8636 | 0.9547 |
| 2010/04         | 720  | 5.6975  | 6.0071  | 0.9548 | 0.3096  | 0.5843 | 0.7531 | 0.9719 |
| 2010/05         | 744  | 8.7525  | 8.7011  | 0.9208 | -0.0514 | 0.8119 | 1.0721 | 0.9587 |
| 2010/06         | 720  | 13.0965 | 13.07   | 0.9478 | -0.0264 | 0.9756 | 1.2409 | 0.9645 |
| 2010/07         | 744  | 16.5179 | 17.0903 | 0.6947 | 0.5724  | 1.0054 | 1.2198 | 0.7925 |

|         |      |         |         |        |        |        |        |        |
|---------|------|---------|---------|--------|--------|--------|--------|--------|
| 2010/08 | 744  | 17.4943 | 18.1982 | 0.5997 | 0.7039 | 1.2019 | 1.433  | 0.7306 |
| 2010/09 | 720  | 13.826  | 14.4631 | 0.9361 | 0.6371 | 1.1638 | 1.4068 | 0.9558 |
| 2010/10 | 744  | 9.6269  | 9.7921  | 0.9277 | 0.1652 | 0.6555 | 0.8707 | 0.9603 |
| 2010/11 | 720  | 5.7547  | 5.8457  | 0.8165 | 0.091  | 0.6735 | 0.8897 | 0.9012 |
| 2010/12 | 744  | 4.3911  | 4.8626  | 0.9167 | 0.4715 | 0.6583 | 0.8657 | 0.9354 |
| 2011/01 | 744  | 2.7575  | 3.2131  | 0.793  | 0.4556 | 0.4965 | 0.5655 | 0.7496 |
| 2011/02 | 672  | 3.7834  | 4.2097  | 0.9289 | 0.4263 | 0.5469 | 0.7421 | 0.9416 |
| all     | 8760 | 8.9082  | 9.2584  | 0.9845 | 0.3501 | 0.7838 | 1.0296 | 0.991  |

---

N : Number of observations

---
